# Supplementary material for: D-Dimers Level as a Possible Marker of Extravascular Fibrinolysis in COVID-19 Patients
Source: MDPI journal article supplement (doi:10.3390/jcm10010039), 2020-12-24
Supplement: s1 [file s1]

## Supplementary Material

**Table S1.** Lung parenchymal involvement assessed by chest computed tomography according to D-dimers staging at peak.

|                   | D-Dimers Staging at Peak        |                                  |                                 | <i>p</i> value |
|-------------------|---------------------------------|----------------------------------|---------------------------------|----------------|
|                   | Stage 1 <3 ULN ( <i>n</i> = 67) | Stage 2 3–6 ULN ( <i>n</i> = 30) | Stage 3 >6 ULN ( <i>n</i> = 26) |                |
| Minimal (<10%)    | 10 (14.9)                       | 2 (6.7)                          | 1 (3.8)                         | 0.001          |
| Moderate (10–25%) | 27 (40.3)                       | 12 (40.0)                        | 4 (15.4)                        |                |
| Severe (25–50%)   | 22 (32.8)                       | 10 (33.3)                        | 6 (23.1)                        |                |
| Critical (>50%)   | 8 (11.9)                        | 6 (20.0)                         | 15 (57.7)                       |                |

Data are presented as *n* (%). Abbreviation: ULN, upper limit of normal.

**Table S2.** Outcomes according to D-Dimers staging at admission.

|                                      | D-Dimers Staging at Admission   |                                  |                                 | <i>p</i> value |
|--------------------------------------|---------------------------------|----------------------------------|---------------------------------|----------------|
|                                      | Stage 1 <3 ULN ( <i>n</i> = 79) | Stage 2 3–6 ULN ( <i>n</i> = 23) | Stage 3 >6 ULN ( <i>n</i> = 16) |                |
| Critical pulmonary injuries (>50%)   | 11 (13.9)                       | 9 (39.1)                         | 7 (43.8)                        | 0.004          |
| Transfer to ICU or in-hospital death | 22 (27.8)                       | 12 (52.2)                        | 5 (31.2)                        | 0.091          |
| ICU Transfer                         | 22 (27.8)                       | 11 (47.8)                        | 5 (31.2)                        | 0.196          |
| In-hospital death                    | 0 (0.0)                         | 1 (4.3)                          | 1 (6.2)                         | 0.115          |
| Discharged alive                     | 65 (95.6)                       | 20 (90.9)                        | 13 (86.7)                       | 0.400          |
| Lung injuries extent Minimal (<10%)  | 12 (15.2)                       | 1 (4.3)                          | 1 (6.2)                         | 0.038          |
| Moderate (10–25%)                    | 32 (40.5)                       | 5 (21.7)                         | 4 (25)                          |                |
| Severe (25–50%)                      | 24 (30.4)                       | 8 (34.8)                         | 4 (25)                          |                |
| Critical (>50%)                      | 11 (13.9)                       | 9 (39.1)                         | 7 (43.8)                        |                |

Data are presented as *n* (%). Abbreviation: ICU, intensive care unit; ULN, upper limit of normal.

**Table S3.** Predictive factors for the occurrence of the composite of in-hospital death or transfer to the intensive care unit.

|                               | Univariable Analysis |                | Multivariable Analysis |                |
|-------------------------------|----------------------|----------------|------------------------|----------------|
|                               | OR [95%CI]           | <i>p</i> Value | OR [95%CI]             | <i>p</i> Value |
| Age                           | 0.98 [0.95–1.00]     | 0.089          |                        |                |
| Male                          | 2.45 [1.08–5.55]     | 0.031          | 1.49 [0.47–4.73]       | 0.496          |
| BMI >30 kg/m <sup>2</sup>     | 1.07 [0.47–2.43]     | 0.858          |                        |                |
| Fibrinogen at admission       | 1.38 [0.99–1.92]     | 0.054          |                        |                |
| Fibrinogen at peak            | 1.48 [1.12–1.95]     | 0.006          | 1.22 [0.87–1.71]       | 0.234          |
| CRP at admission              | 1.00 [0.99–1.00]     | 0.128          |                        |                |
| CRP at peak                   | 1.01 [1.00–1.01]     | <0.001         | 1.00 [0.99–1.01]       | 0.330          |
| Leukocytes at admission       | 0.96 [0.85–1.09]     | 0.619          |                        |                |
| Leukocytes at peak            | 1.00 [0.98–1.02]     | 0.460          |                        |                |
| Lymphocytes at admission      | 0.59 [0.24–1.46]     | 0.258          |                        |                |
| Procalcitonin at admission    | 0.93 [0.82–1.06]     | 0.318          |                        |                |
| BNP at admission              | 0.99 [0.99–1.00]     | 0.301          |                        |                |
| D-Dimers staging at admission | 1.17 [0.68–1.99]     | 0.556          |                        |                |
| D-Dimers staging at peak      | 2.91 [1.76–4.83]     | <0.001         | 2.50 [1.27–4.93]       | 0.008          |

Abbreviations: BMI, body mass index; BNP, B-type natriuretic peptide; CI, confidence interval; CRP, C-reactive protein; OR, odds ratio.
